# Supplementary material for: Dissecting Target Toxic Tissue and Tissue Specific Responses of Irinotecan in Rats Using Metabolomics Approach
Source: PubMed Central journal article supplement (PMC5344918; doi:10.3389/fphar.2017.00122), 2017-03-10
Supplement: Presentation_1.pdf [file Presentation_1.pdf]

## **Supplementary Material**

### **Dissecting target toxic tissue and tissue specific responses of irinotecan in rats using metabolomics approach**

Yiran Yao<sup>1,2,3#</sup>, Pei Zhang<sup>1,2,3#</sup>, Jing Wang<sup>4</sup>, Jiaqing Chen<sup>1,2,3</sup>, Yong Wang<sup>5</sup>, Yin Huang<sup>1,2,3</sup>, Zunjian Zhang<sup>1,2,3,\*</sup>, Fengguo Xu<sup>1,2,3,\*</sup>

<sup>1</sup> Key Laboratory of Drug Quality Control and Pharmacovigilance (Ministry of Education), China Pharmaceutical University, Nanjing 210009, China

<sup>2</sup> Jiangsu Key Laboratory of Drug Screening, China Pharmaceutical University, Nanjing 210009, China

<sup>3</sup> State Key Laboratory of Natural Medicine, China Pharmaceutical University, Nanjing 210009, China

<sup>4</sup> School of Pharmacy, Shanxi University of Chinese Medicine, Xianyang 712046, China

<sup>5</sup> Jiangsu Institute for Food and Drug Control, Nanjing 210008, China

# these authors have contributed equally to this paper

Corresponding authors:

\* Prof. Fengguo Xu

E-mail: fengguoxu@gmail.com

\* Prof. Zunjian Zhang

E-mail: zunjianzhangcpu@hotmail.com

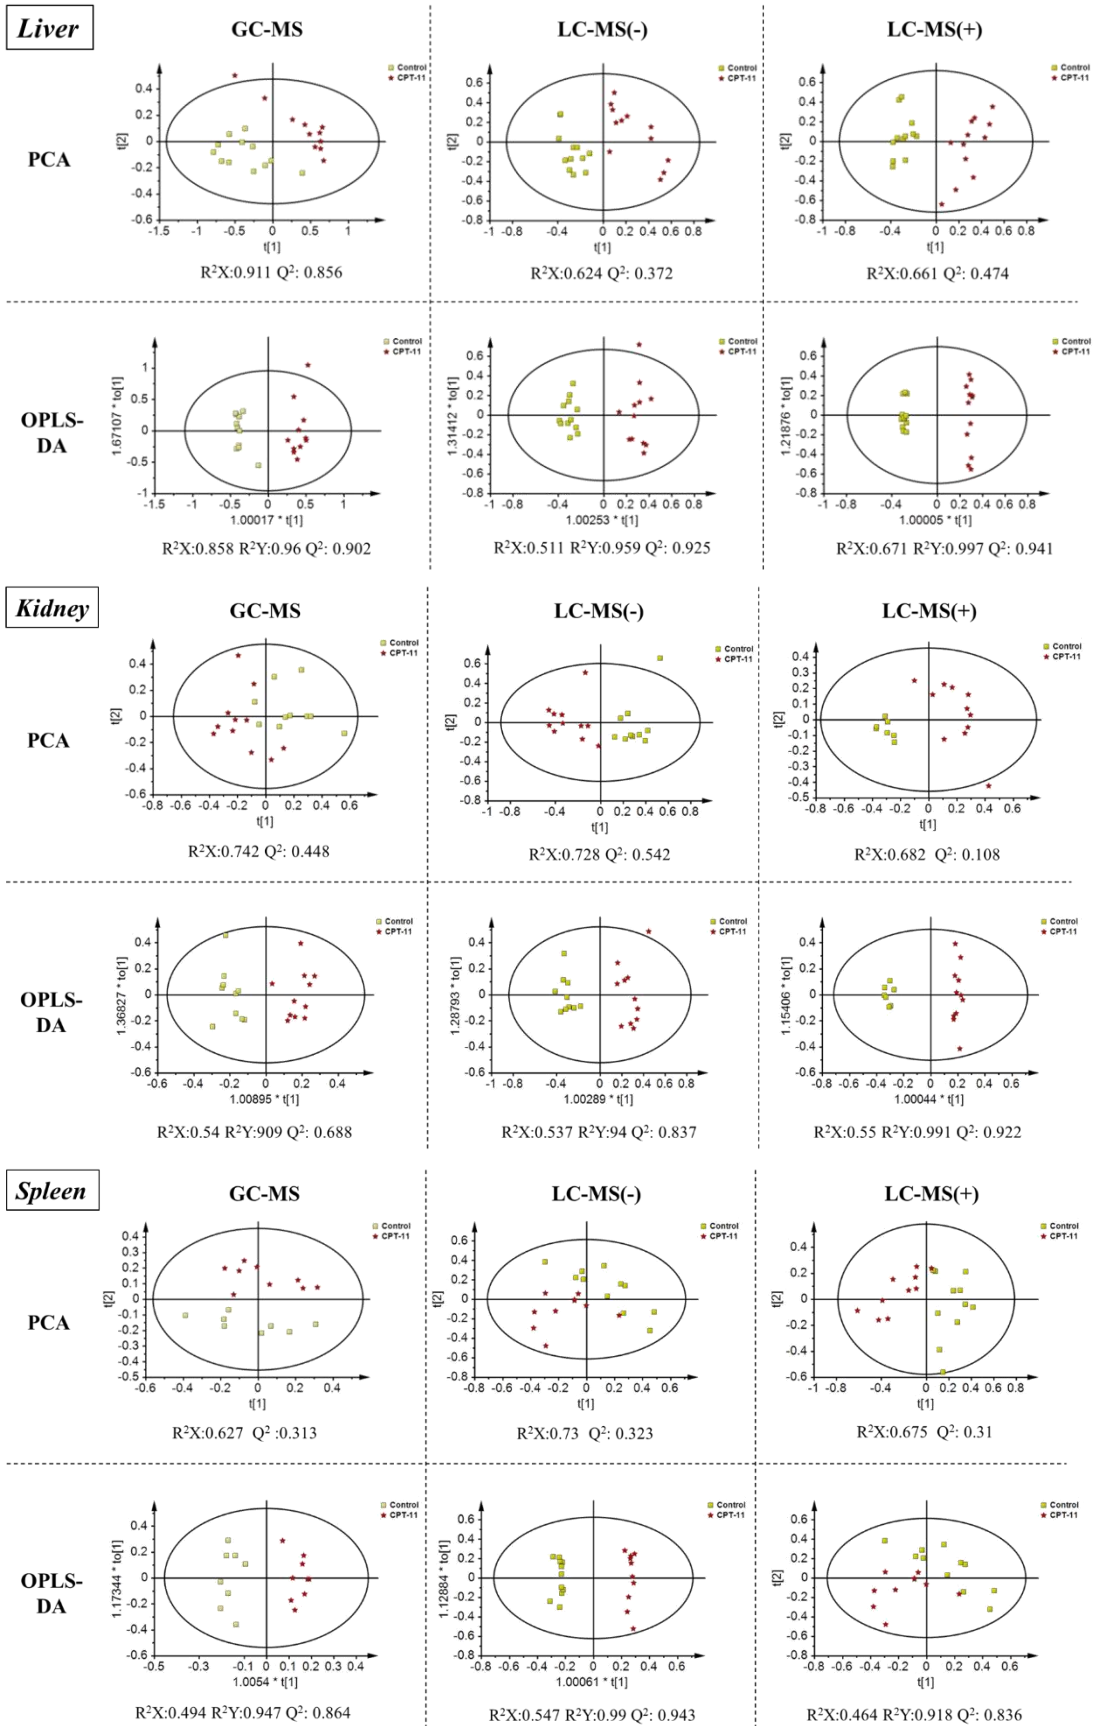

**Lung**

PCA

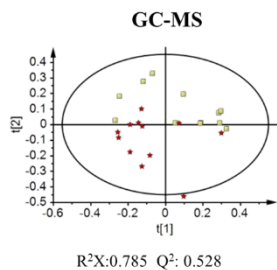

LC-MS(-)

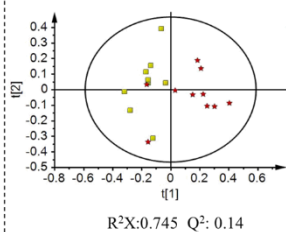

LC-MS(+)

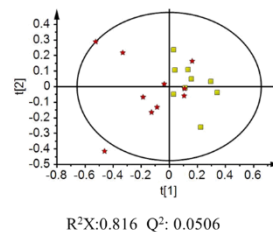

OPLS-DA

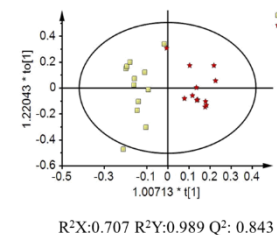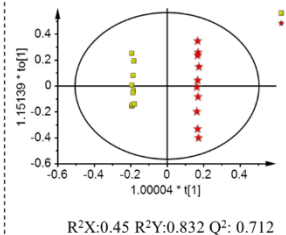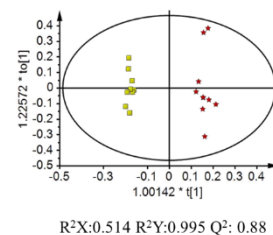

**Heart**

PCA

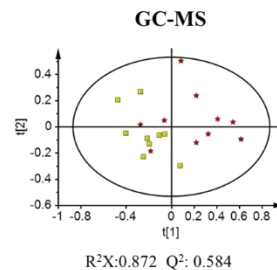

LC-MS(-)

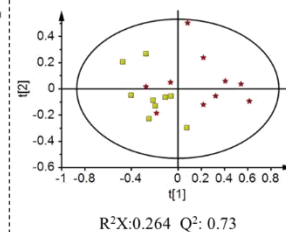

LC-MS(+)

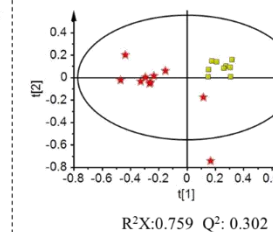

OPLS-DA

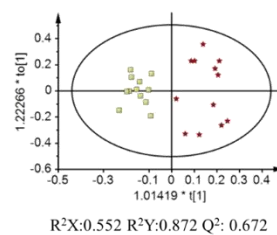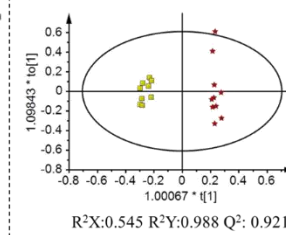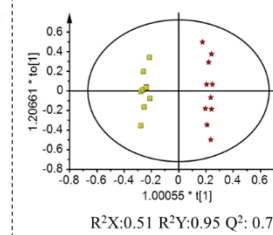

**Ileum**

PCA

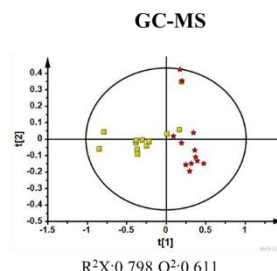

LC-MS(-)

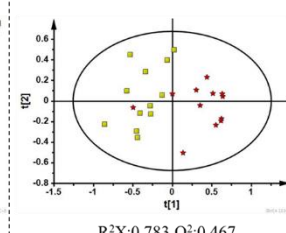

LC-MS(+)

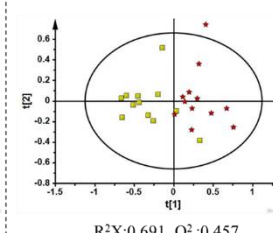

OPLS-DA

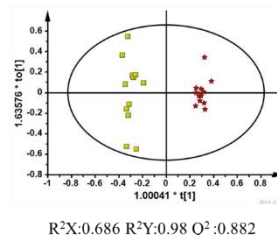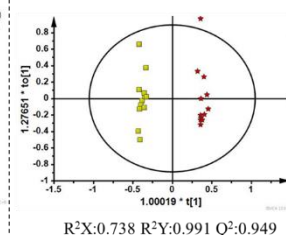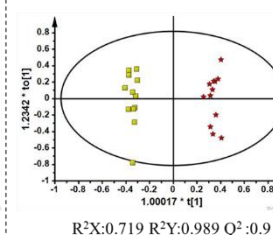

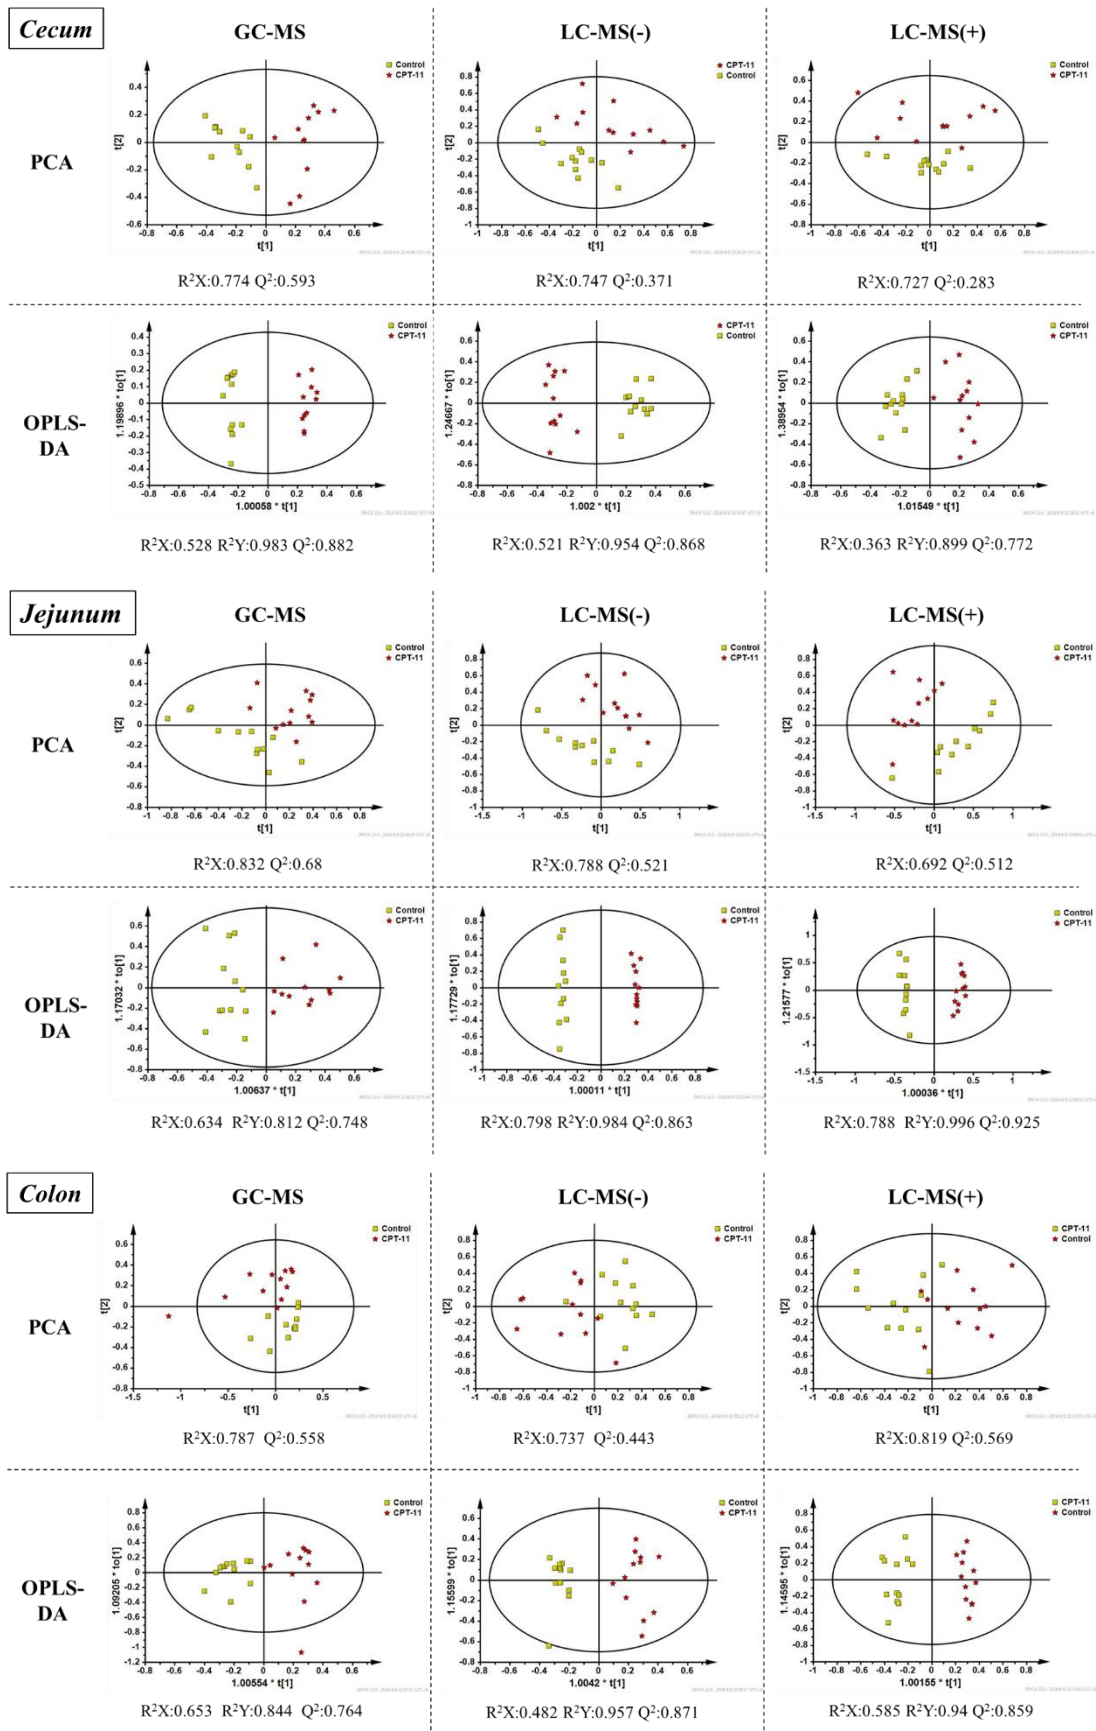

**Figure S1** PCA and OPLS-DA score plots of different tissues between control group and CPT-11 treated group.

**Table S1** Change trends of differential metabolites in different tissues in CPT-11 treated group.

| Metabolites                | Jejunum | Ileum | Cecum | Colon | Liver | Kidney | Spleen | Lung | Heart |
|----------------------------|---------|-------|-------|-------|-------|--------|--------|------|-------|
| Ethanolamine               | -       | -     | -     | ↑*    | ↓*    | -      | ↑*     | -    | -     |
| Alanine <sup>#</sup>       | ↓*      | ↓*    | -     | -     | -     | ↓*     | ↓*     | -    | ↓*    |
| Butanoic acid              | -       | -     | ↓*    | -     | ↓*    | -      | ↓*     | -    | -     |
| Valine <sup>#</sup>        | ↓*      | ↓*    | ↓*    | ↓*    | ↓*    | ↓*     | ↑*     | ↓*   | -     |
| Urea <sup>#</sup>          | -       | ↑*    | -     | ↓*    | ↓*    | ↓*     | -      | ↓*   | -     |
| Leucine <sup>#</sup>       | ↓*      | ↓*    | ↓*    | ↓*    | ↓*    | ↓*     | ↑*     | ↓*   | -     |
| Phosphoric acid            | ↑*      | ↑*    | ↑*    | ↑*    | ↓*    | ↑*     | -      | ↓*   | ↑*    |
| Isoleucine <sup>#</sup>    | ↓*      | ↓*    | ↓*    | ↓*    | ↓*    | ↓*     | ↑*     | ↑*   | -     |
| Proline <sup>#</sup>       | ↓*      | ↓*    | ↓*    | ↓*    | ↓*    | ↓*     | -      | ↑*   | -     |
| Pyrimidine                 | -       | ↑*    | ↑*    | -     | -     | -      | -      | -    | -     |
| Serine <sup>#</sup>        | ↓*      | ↓*    | ↓*    | ↓*    | ↓*    | ↓*     | -      | -    | -     |
| Threonine <sup>#</sup>     | ↓*      | ↓*    | ↓*    | ↓*    | ↓*    | ↓*     | ↓*     | ↓*   | ↓*    |
| Succinic acid <sup>#</sup> | -       | -     | ↓*    | ↑*    | ↑*    | ↓*     | ↓*     | ↑*   | ↓*    |
| Methionine                 | -       | ↓*    | -     | ↓*    | ↓*    | ↓*     | -      | -    | -     |
| Aspartic acid <sup>#</sup> | ↑*      | ↑*    | ↑*    | ↑*    | ↓*    | -      | ↑*     | ↑*   | ↓*    |
| Creatinine <sup>#</sup>    | ↑*      | -     | -     | -     | ↑*    | ↑*     | -      | -    | -     |
| Glutamic acid <sup>#</sup> | -       | ↑*    | ↑*    | ↑*    | ↓*    | ↓*     | -      | -    | ↓*    |
| Phenylalanine <sup>#</sup> | ↓*      | ↓*    | ↓*    | -     | ↓*    | -      | ↑*     | ↑*   | -     |
| Lysine <sup>#</sup>        | -       | ↓*    | -     | -     | ↓*    | -      | -      | ↑*   | -     |
| 4-hydroxy-proline          | -       | -     | -     | -     | -     | -      | -      | ↓*   | -     |
| N-Acetylglutamine          | -       | -     | ↓*    | -     | -     | -      | -      | -    | -     |
| Glutamine <sup>#</sup>     | -       | -     | ↓*    | ↓*    | ↓*    | ↓*     | -      | -    | -     |
| 9H-Purine                  | -       | ↑*    | ↓*    | ↓*    | ↓*    | -      | -      | ↓*   | -     |
| Citric acid <sup>#</sup>   | -       | ↓*    | -     | -     | -     | -      | -      | ↓*   | -     |
| Glucose                    | -       | ↓*    | -     | ↓*    | ↑*    | ↑*     | -      | ↓*   | ↑*    |
| Histidine                  | -       | ↓*    | ↓*    | -     | ↓*    | -      | ↑*     | ↑*   | -     |
| Tyrosine <sup>#</sup>      | ↓*      | ↓*    | ↓*    | ↓*    | ↓*    | ↓*     | -      | ↓*   | -     |
| Myo-Inositol               | -       | -     | ↓*    | ↓*    | -     | -      | ↓*     | -    | -     |
| Palmitic acid              | ↓*      | ↑*    | -     | -     | -     | -      | -      | ↓*   | ↓*    |
| Uric acid                  | ↓*      | -     | -     | -     | -     | -      | -      | ↓*   | -     |
| Linoleic acid <sup>#</sup> | ↓*      | -     | -     | -     | ↓*    | -      | -      | -    | -     |
| Oleic acid <sup>#</sup>    | ↓*      | -     | -     | -     | -     | -      | -      | -    | -     |
| Arachidonic acid           | ↓*      | -     | -     | ↑*    | ↓*    | -      | -      | -    | -     |
| Tryptophan <sup>#</sup>    | -       | ↓*    | -     | -     | -     | -      | -      | -    | -     |
| Cholesterol <sup>#</sup>   | ↑*      | ↑*    | ↑*    | ↓*    | ↓*    | ↓*     | ↑*     | -    | ↑*    |
| Ascorbic acid              | -       | ↑*    | -     | -     | -     | -      | ↓*     | -    | -     |
| TCA <sup>#</sup>           | ↓*      | ↓*    | -     | ↓*    | -     | -      | -      | -    | -     |
| GCA <sup>#</sup>           | ↓*      | ↓*    | -     | ↓*    | -     | -      | -      | -    | -     |
| TDCA <sup>#</sup>          | ↑*      | ↑*    | ↑*    | -     | ↑*    | -      | -      | -    | -     |
| CA <sup>#</sup>            | ↑*      | ↓*    | -     | -     | -     | -      | -      | -    | -     |
| DCA <sup>#</sup>           | ↑*      | ↑*    | ↑*    | ↑*    | ↑*    | -      | -      | -    | -     |
| Muricholic acid            | -       | -     | -     | -     | -     | -      | -      | -    | -     |

| Metabolites     | Jejunum | Ileum | Cecum | Colon | Liver | Kidney | Spleen | Lung | Heart |
|-----------------|---------|-------|-------|-------|-------|--------|--------|------|-------|
| Murocholic acid | -       | ↓*    | ↓*    | -     | -     | -      | -      | -    | -     |
| GCDCA#          | ↑*      | -     | -     | -     | -     | -      | -      | -    | -     |
| LysoPC(14:0)    | -       | -     | -     | -     | -     | -      | -      | -    | -     |
| LysoPC(15:0)    | -       | -     | -     | -     | ↑*    | -      | -      | ↓*   | -     |
| LysoPC(16:1)    | -       | -     | -     | -     | ↓*    | -      | -      | -    | -     |
| LysoPC(18:0)    | ↑*      | ↑*    | -     | -     | -     | -      | -      | -    | ↑*    |
| LysoPC(18:1)    | ↑*      | -     | ↑*    | ↑*    | ↑*    | -      | -      | -    | -     |
| LysoPC(20:1)    | -       | -     | -     | -     | -     | -      | -      | -    | -     |
| LysoPC(20:2)    | -       | -     | -     | -     | -     | -      | ↑*     | -    | -     |
| LysoPC(20:4)    | -       | -     | -     | -     | -     | -      | -      | -    | -     |
| LysoPC(P-18:0)  | ↓*      | -     | ↓*    | -     | -     | ↓*     | -      | -    | -     |
| LysoPE(16:0)    | -       | ↓*    | ↑*    | ↑*    | -     | -      | -      | -    | -     |
| LysoPE(16:1)    | -       | -     | -     | ↑*    | -     | -      | -      | ↓*   | ↑*    |
| LysoPE(18:0)    | -       | -     | ↑*    | ↑*    | -     | -      | -      | -    | -     |
| LysoPE(18:1)    | -       | ↓*    | -     | ↑*    | ↓*    | -      | -      | -    | -     |
| LysoPE(18:2)    | ↑*      | ↑*    | ↑*    | ↑*    | ↓*    | ↓*     | ↑*     | -    | -     |
| LysoPE(20:4)    | -       | ↑*    | -     | -     | -     | -      | -      | -    | -     |
| LysoPE(22:4)    | -       | ↑*    | -     | -     | -     | -      | -      | -    | -     |
| PE(P-16:0e)     | ↓*      | ↑*    | -     | -     | -     | -      | -      | -    | -     |

The levels of potential biomarkers labeled with (↓) were down-regulated and (↑) up-regulated in CPT-11 treated rats.

\* Mann Whitney U test,  $p < 0.05$ , in comparison with control group.

#These metabolites were identified by comparing with commercial standards.

Abbreviations: LysoPC, lyso-phosphatidylcholine; LysoPE, lyso-phosphatidylethanolamines; PE, phosphatidylethanolamines; CA: cholic acid; DCA: deoxycholic acid; TCA: taurocholic acid; TDCA: taurodeoxycholic acid; GCA: glycocholic acid; GCDCA: glycochenodeoxycholic acid.
